# Supplementary material for: Inducing cancer indolence by targeting mitochondrial Complex I is potentiated by blocking macrophage-mediated adaptive responses
Source: Springer Nature journal article supplement (doi:10.1038/s41467-019-08839-1), 2019-02-22
Supplement: MOESM1 [file 41467_2019_8839_MOESM1_ESM.pdf]

## **Supplementary information**

Inducing cancer indolence by targeting mitochondrial Complex I is potentiated by blocking macrophage-mediated adaptive responses

Kurelac et al.

## Supplementary Figures

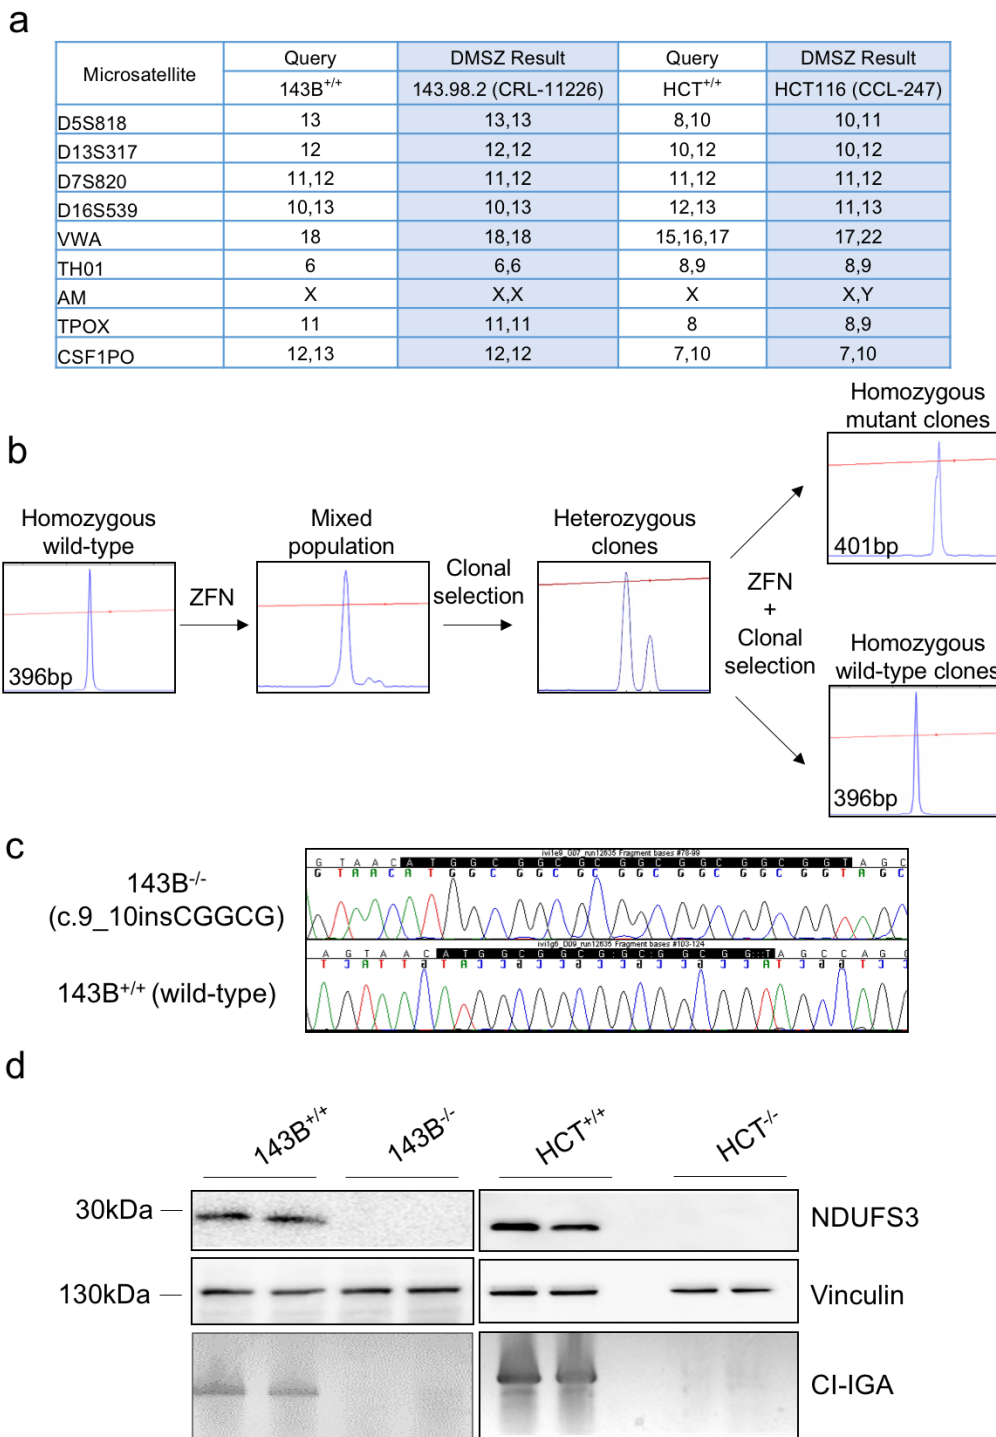

**Supplementary Figure 1. Generation and characterization of cell models used in this study.** (a) Evaluation of the sequence tandem repeats (microsatellites) defining the origin of 143B and HCT116 (HCT) cell lines. The results of the best match provided by the Online STR Analysis software ([www.dmsz.de](http://www.dmsz.de)) are reported in the blue columns. (b) Fluorescent-PCR data in a scheme representing the generation of zinc-finger endonuclease (ZFN)-mediated *NDUF53* knock-out cells and respective revertant wild-type controls. bp: base pairs. (c) Sanger sequencing-derived electropherograms showing the frameshift c.9\_10insCGGCG mutation causing *NDUF53* functional knock-out. (d) *NDUF53* western blot and CI In-Gel Activity (CI-IGA) of control (+/+) and *NDUF53* knock-out (-/-) cells. Vinculin is used as loading control.

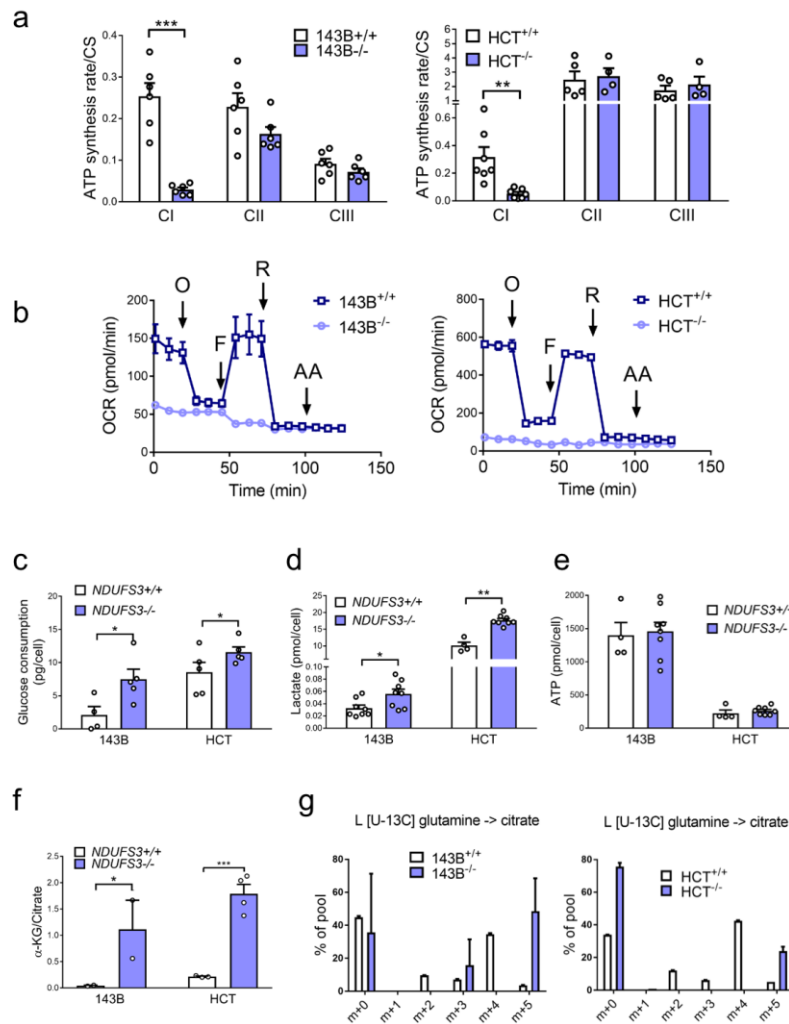

**Supplementary Figure 2. Biochemical characterization of NDUFS3 KO cells.** (a) Rate of mitochondrial ATP synthesis in digitonin-permeabilized 143B (data were log transformed,  $n=6$ ,  $df=10$ ,  $t=9.3$ ) and HCT (data were log transformed,  $n=7$ ,  $df=12$ ,  $t=5.4$ ) cells driven by pyruvate/malate (CI), succinate (CII) or  $DBH_2$  (CIII). Data (mean+s.e.m.) are normalized on citrate synthase (CS) activity and protein content. (b) Oxygen consumption rate (OCR) profile of 143B ( $n=3$ ) and HCT ( $n=1$ ) cells determined upon injection of 1  $\mu$ M oligomycin (O), 1  $\mu$ M rotenone (R) and 1  $\mu$ M antimycin A (A) in specific Seahorse medium. FCCP (F) concentration was determined by titration and used 0.5  $\mu$ M for CI-competent cells and 0.1  $\mu$ M for CI-deficient cells. Data (mean $\pm$ s.e.m.) are normalized on SRB absorbance. (c) Glucose consumption determined in 143B ( $n=5$ ,  $df=8$ ,  $t=2.6$ ) and HCT cells ( $n=5$ ,  $df=8$ ,  $t=2.5$ ) cultured in basal conditions for 24 hours. Data (mean+s.e.m.) are normalized on cell number. (d) L-lactate production in 143B ( $n\geq 6$ ,  $df=12$ ,  $t=2.3$ ) and HCT cells ( $n\geq 4$ ,  $df=10$ ,  $t=7.5$ ) cultured in basal conditions for 24 hours. Data (mean+s.e.m.) are normalized on cell number. (e) Total ATP amount measured in 143B ( $n\geq 4$ ) and HCT cells ( $n\geq 4$ ) cultured in basal conditions. Data (mean+s.e.m.) are normalized on cell number. (f)  $\alpha$ -KG/citrate ratio in 143B (data were log transformed,  $n=2$ ,  $df=2$ ,  $t=5.4$ ) and HCT (data were log transformed,  $n\geq 3$ ,  $df=5$ ,  $t=16.7$ ) cell lines cultured in basal conditions. Data are mean+s.e.m. (g) Isotope-labelled carbon (<sup>13</sup>C) incorporation into citrate upon 5 hours incubation with <sup>13</sup>C-glutamine (2 mM), in 143B ( $n=2$ ) and HCT ( $n=2$ ) cells. Data are expressed as percentage of citrate total levels and are mean+s.e.m. (h) Cell viability under basal conditions determined by SRB assay. Data are mean $\pm$ s.e.m. [ $n=3$ ,  $df=4$ ,  $t(72h)=6.2$ ]. In each panel, statistical significance is specified with asterisks (\* $p < 0.05$ , \*\* $p < 0.01$ , \*\*\* $p < 0.001$ ).

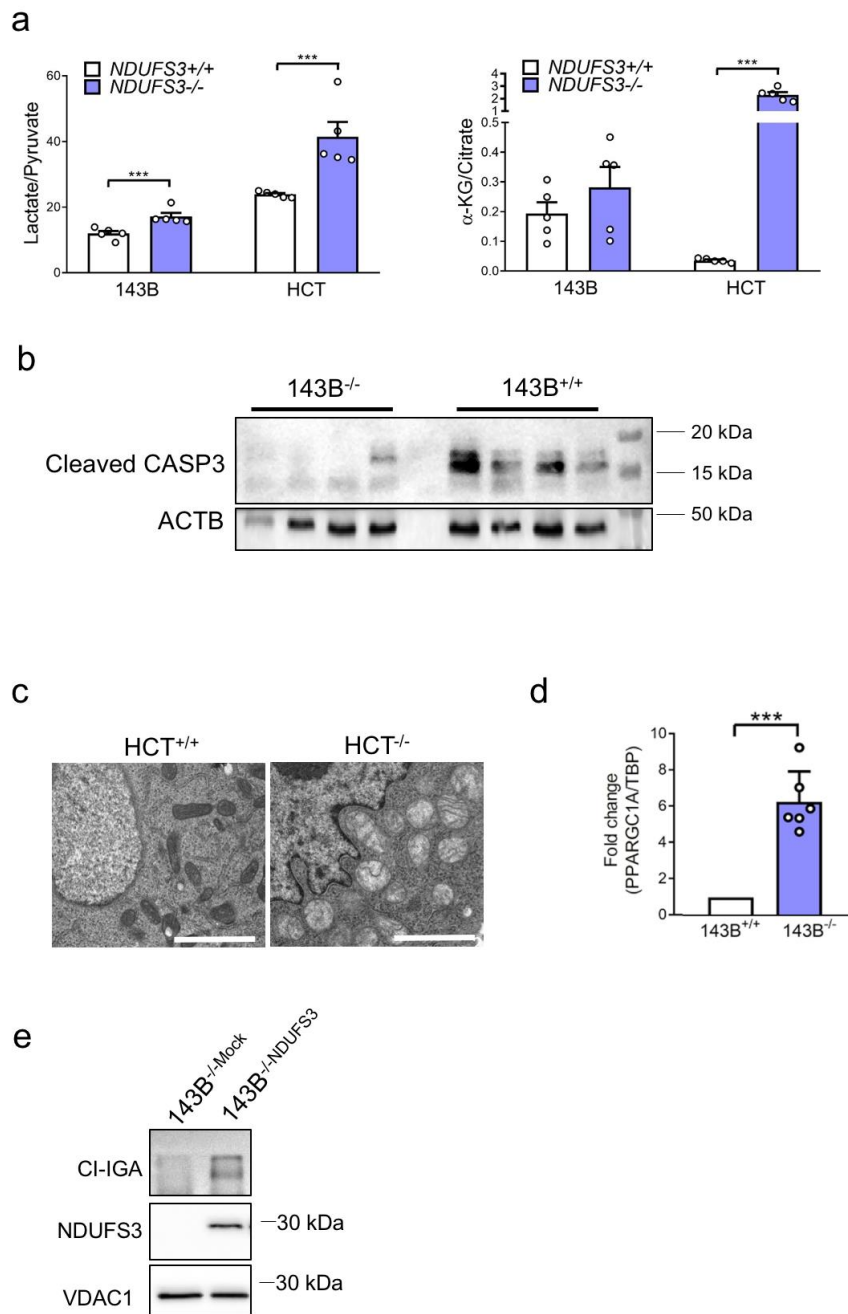

**Supplementary Figure 3. Recapitulation of oncogenic phenotype by *NDUFS3* KO cells and xenografts.** (a) Lactate/pyruvate and  $\alpha$ -KG/citrate ratios measured in xenograft-derived 143B [(n=5, df=8, t(lactate/pyruvate)=3.922, t(aKG/citrate)=1.135)] and HCT [(n=5, df=8), t(lactate/pyruvate)=3.922, t(aKG/citrate)=10.08] cells. Data are mean+s.e.m. (b) Cleaved Caspase 3 western blot analysis in 143B xenografts.  $\beta$ -actin was used as loading control. (c) Evaluation of mitochondrial ultrastructure in HCT cell line. Representative electron micrographs are shown. Scale bars: 2  $\mu$ m. (d) *PPARGC1A* expression levels in 143B xenografts evaluated by qRT-PCR. Data are mean+s.e.m. (n=6, df=10, t=9.6). Statistical significance is specified with asterisks (\*\*\*)  $p < 0.001$ . (e) Representative experiment of CI In-Gel Activity (CI-IGA) and western blot for *NDUFS3* in 143B<sup>-/-</sup> cells transduced with the empty vector (143B<sup>-/-</sup>-Mock) or wild-type *NDUFS3* (143B<sup>-/-</sup>-*NDUFS3*). *VDAC1* was used as loading control.

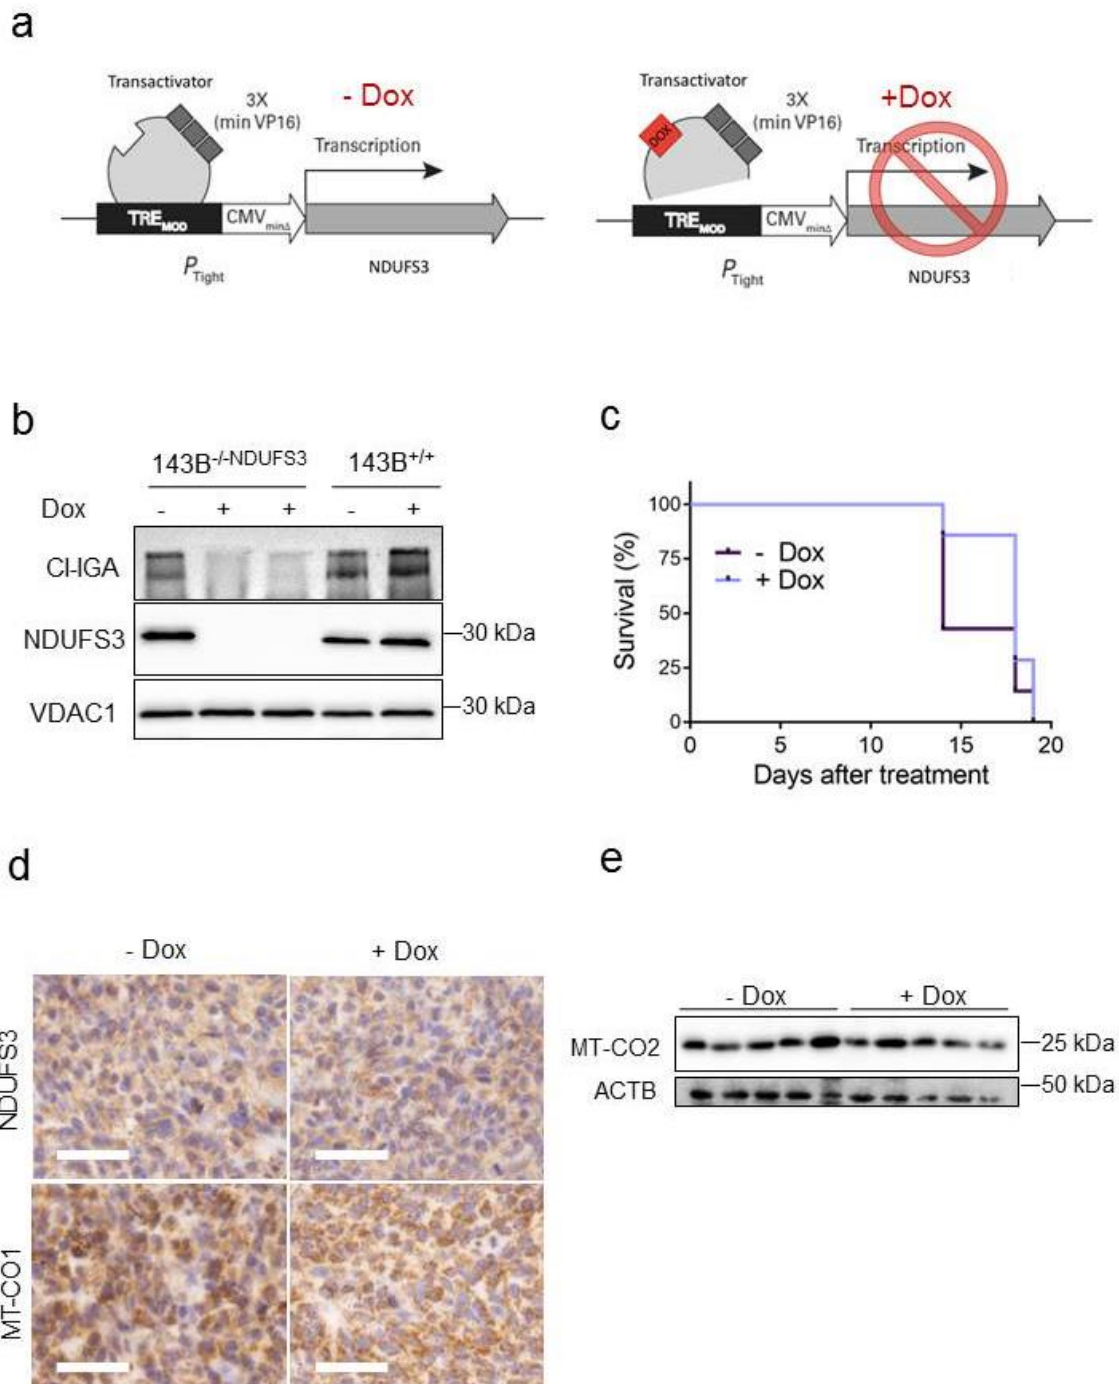

**Supplementary Figure 4. Doxycycline (Dox)-inducible Tet-Off system for *NDUFS3*.** (a) Scheme of Doxycycline (Dox)-inducible system which allows constitutive *NDUFS3* expression when the transactivator is active, and triggers *NDUFS3* knock-out in the presence of Dox. (b) Representative CI In-Gel Activity (CI-IGA) and *NDUFS3* western blot in 143B cells cultured with or without Dox (100 ng mL<sup>-1</sup>, 9 days). VDAC1 was used as loading control. (c) Kaplan-Meier curve of CD-1 nude mice injected with CI-competent 143B cells and treated with or without Dox (1 mg mL<sup>-1</sup> in drinking water). Survival end-point: xenografts reaching 10% of animal weight. (d) Representative images of immunohistochemical staining for nuclear- (*NDUFS3*) and mitochondrial DNA-encoded (MT-CO1) subunits of OXPHOS complexes in 143B<sup>+/+</sup> xenografts derived from CD-1 nude mice treated with or without Dox (1 mg mL<sup>-1</sup> in drinking water). Scale bars: 50  $\mu$ m. (e) MT-CO2 western blot analysis in 143B<sup>+/+</sup> xenografts derived from CD-1 nude mice treated with or without Dox (1 mg mL<sup>-1</sup> in drinking water).  $\beta$ -actin was used as loading control.

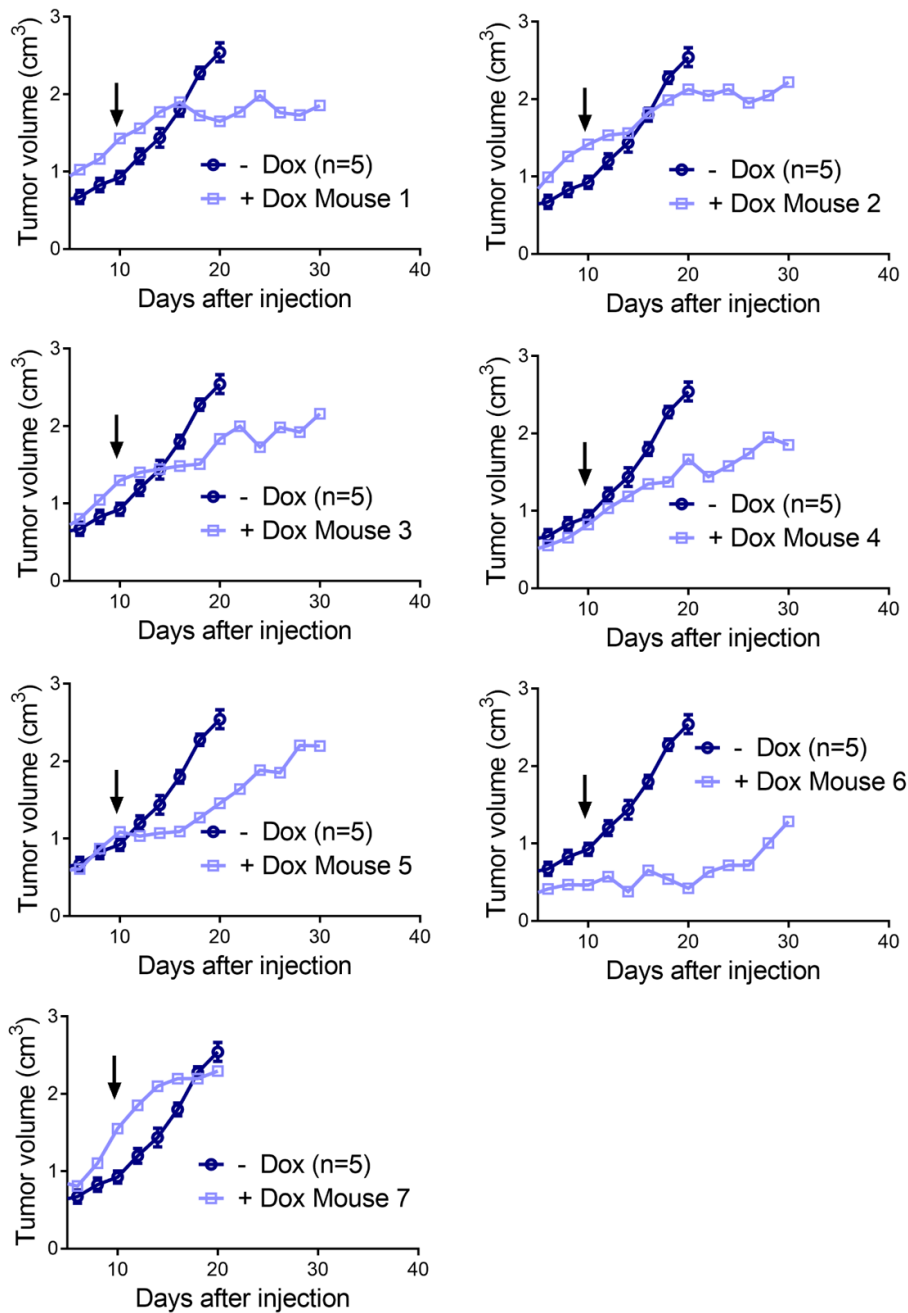

**Supplementary Figure 5. Growth curves of xenografts developed by individual animals in which CI knockout was induced by Dox treatment.** CD-1 nude mice were injected with 143B<sup>-/-</sup><sub>NDUFS3</sub> cells and treated with Dox (1 mg mL<sup>-1</sup> in drinking water) when reaching 500 mm<sup>3</sup> (light blue). As control, the tumor growth curve presenting the average values relative to the untreated group (dark blue, n=5, data are mean±s.e.m.) is shown in each graph. The arrows indicate the timing at which inducible *NDUFS3* ablation induces CI deficiency (9 days).

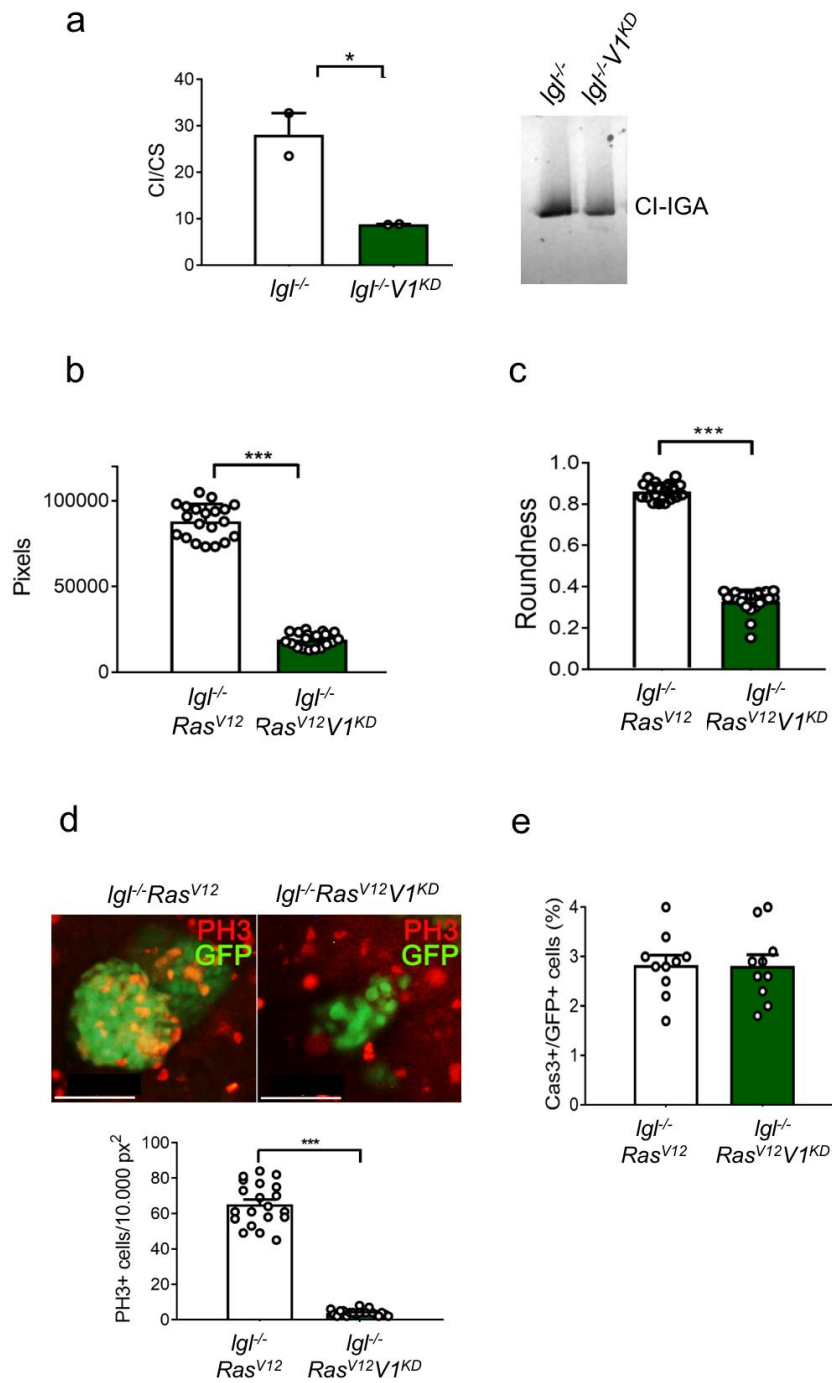

**Supplementary Figure 6. CI impairment impinges on tumor proliferation in *Drosophila melanogaster* cancer models.** (a) CI spectrophotometric activity normalized on citrate synthase activity (CI/CS) and CI In-Gel Activity (CI-IGA) in CI-competent (*lgl<sup>-/-</sup>*) and deficient (*lgl<sup>-/-</sup>V1<sup>KD</sup>*) epithelial tumors of the fly (data were log transformed, n=2, df=2, t=6.9). Data are mean+s.e.m. (b) Average tumor size (GFP<sup>+</sup> pixels, n=20, df=24, t=28.5) and (c) corresponding roundness coefficient (n=20, df=38, t=34.6) of tumorous *Drosophila* wing discs was determined in control (*lgl<sup>-/-</sup>Ras<sup>V12</sup>*) and CI-deficient (*lgl<sup>-/-</sup>Ras<sup>V12</sup>V1<sup>KD</sup>*) clones. Student's t-test assuming unequal variance was applied for comparing average tumor size. Data are mean+s.e.m. (d) Expression of mitotic index marker PH3 in CI-competent (*lgl<sup>-/-</sup>*) and deficient (*lgl<sup>-/-</sup>V1<sup>KD</sup>*) epithelial tumors of the fly. Data are mean+s.e.m. Representative images of the immunofluorescent staining are shown. Scale bars: 40  $\mu$ m. (e) Amount of caspase 3 (Cas3) positive cells normalized on tumors cells (GFP<sup>+</sup>) in CI-competent (*lgl<sup>-/-</sup>*) and deficient (*lgl<sup>-/-</sup>V1<sup>KD</sup>*) *Drosophila* tumors. Data are mean+s.e.m. (n=10). Statistical significance is specified with asterisks (\*p < 0.05, \*\*\*p < 0.001).

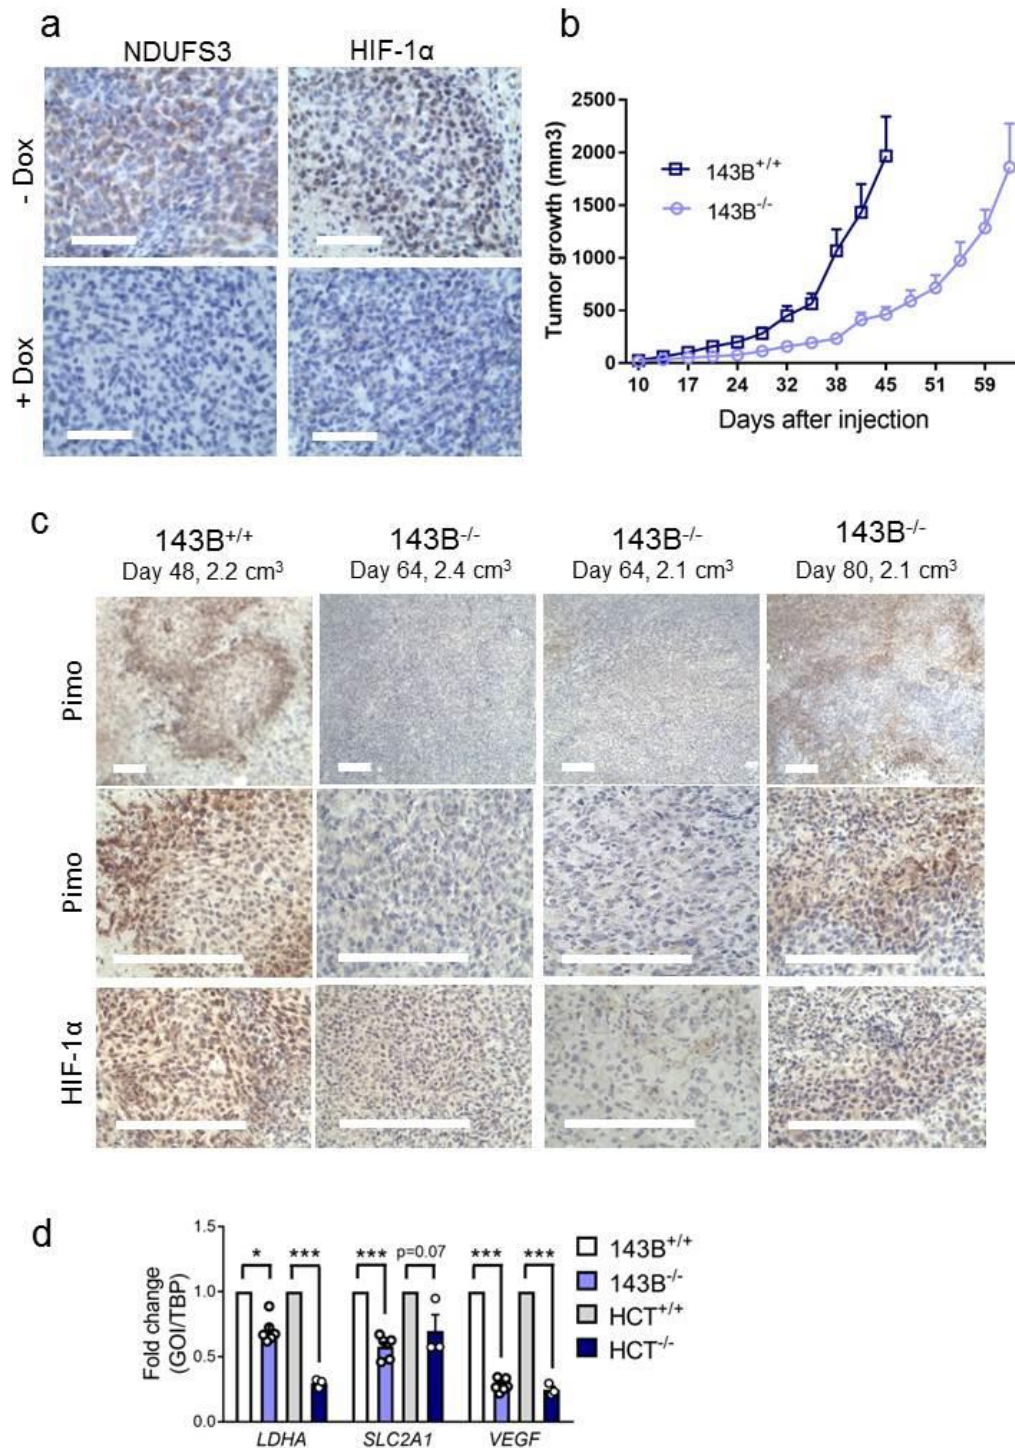

**Supplementary Figure 7. HIF-1 $\alpha$  is destabilized in NDUFS3 KO xenografts.** (a) Representative immunohistochemical staining for NDUFS3 and HIF-1 $\alpha$  in 143B<sup>-/-</sup>NDUFS3<sup>-/-</sup> xenografts treated with or without Dox (1 mg mL<sup>-1</sup> in drinking water). Scale bars: 50  $\mu$ m. (b) Growth curves of 143B xenografts (n=15) in CD-1 nude mice. Data are mean $\pm$ s.e.m. (c) Representative image of immunohistochemistry staining for hypoxia marker pimonidazole (Pimo) and HIF-1 $\alpha$  of xenografts from CD-1 nude mice injected with 143B cells (n=12). Survival end-point: xenografts reaching 10% of animal weight. The size and the days post injection at the end-point are indicated for each tumor. Scale bars: 100  $\mu$ m. (d) Expression levels of HIF-1 $\alpha$  target genes evaluated by qRT-PCR in 143B [n=6, df=10, t(LDHA)=2.5, t(SLC2A1)=4.5, t(VEGF)=14.8] and HCT [n=3, df=4, t(LDHA)=11.4, t(SLC2A1)=2.1, t(VEGF)=11.3] cells cultured in 1% O<sub>2</sub> for 24 hours. Data are mean+s.e.m. Statistical significance is specified with asterisks (\*p < 0.05, \*\*\*p < 0.001).



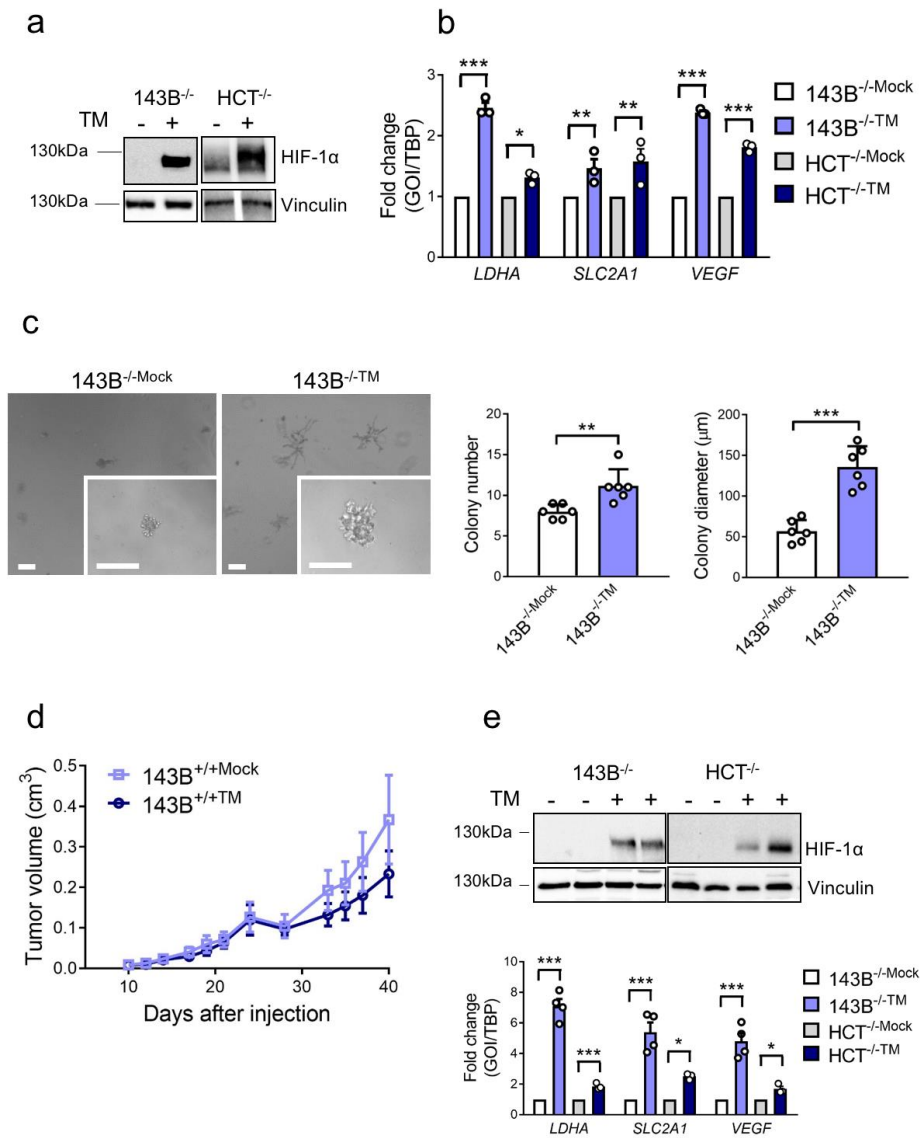

**Supplementary Figure 8. Characterization of CI-deficient cells and xenografts complemented with TM-HIF-1 $\alpha$  (TM).** (a) HIF-1 $\alpha$  western blot in CI-deficient cells expressing TM-HIF-1 $\alpha$  (TM) or carrying the empty vector (-) cultured *in vitro* in basal conditions. Vinculin was used as loading control. (b) qRT-PCR of HIF-1 $\alpha$  target genes in CI-deficient 143B (n=4, df=6, t(LDHA)=6.9, t(SLC2A1)=5.4, t(VEGF)=27.3) and HCT (n=3, df=4, t(LDHA)=38.5, t(SLC2A1)=5.4, t(VEGF)=16) cells carrying empty vector (Mock) or TM-HIF-1 $\alpha$  (TM) cultured *in vitro* in basal conditions. Data are mean+s.e.m. (n=3). (c) Colony formation assay of 143B cells cultured in 3D matrigel/collagen 2:1 media. Colony number (n=6, df=10, t=3.5) and size (n=6, df=10, t=6.7) were compared. Data are mean+s.e.m. Scale bars: 200  $\mu$ m. (d) Growth curves in CD-1 nude mice of 143B<sup>+/+</sup> xenografts (n=6) carrying empty vector (Mock) or TM-HIF-1 $\alpha$  (TM). Data are mean $\pm$ s.e.m. (e) HIF-1 $\alpha$  stabilization (western blot) and transcriptional activity (qRT-PCR) in xenografts expressing TM-HIF-1 $\alpha$  (TM) or carrying the empty vector (-). Vinculin was used as loading control. qRT-PCR of HIF-1 $\alpha$  target genes in CI-deficient 143B (n=4, df=6, t(LDHA)=13.2, t(SLC2A1)=8, t(VEGF)=6.8) and HCT (n=3, df=4, t(LDHA)=6.7, t(SLC2A1)=4.1, t(VEGF)=4.8) xenografts carrying empty vector (Mock) or TM-HIF-1 $\alpha$  (TM). Data are mean+s.e.m. Statistical significance is specified with asterisks (\*p < 0.05, \*\*p < 0.01, \*\*\*p < 0.001).

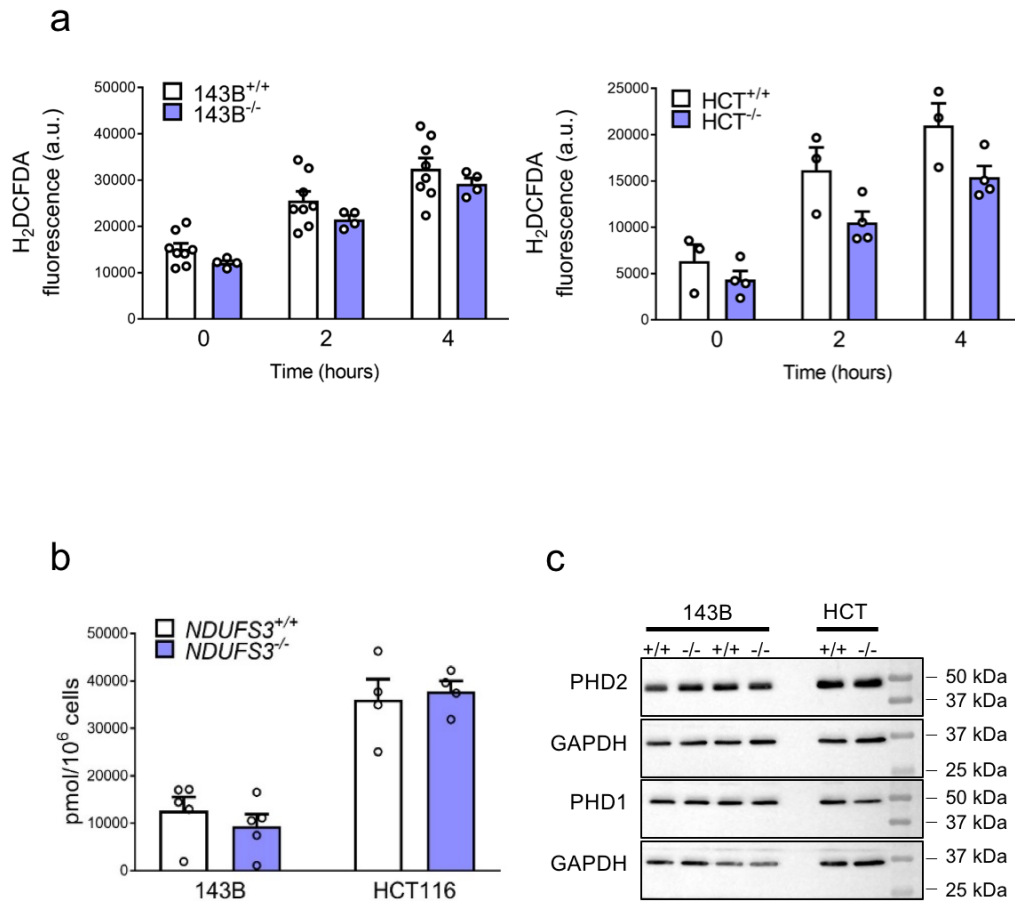

**Supplementary Figure 9. HIF-1 $\alpha$  status does not depend on oxidative stress or prolyl hydroxylases (PHDs) levels. (a)** H<sub>2</sub>O<sub>2</sub> production in 143B and HCT cells, determined by using H<sub>2</sub>DCFDA probe. Data are mean+s.e.m. (n $\geq$ 3). **(b)** Total glutathione (GSH+GSSG) levels in 143B and HCT cells. Data are mean+s.e.m. (n $\geq$ 4). **(c)** PHD1 and PHD2 western blot analysis in 143B and HCT cells. GAPDH was used as loading control.

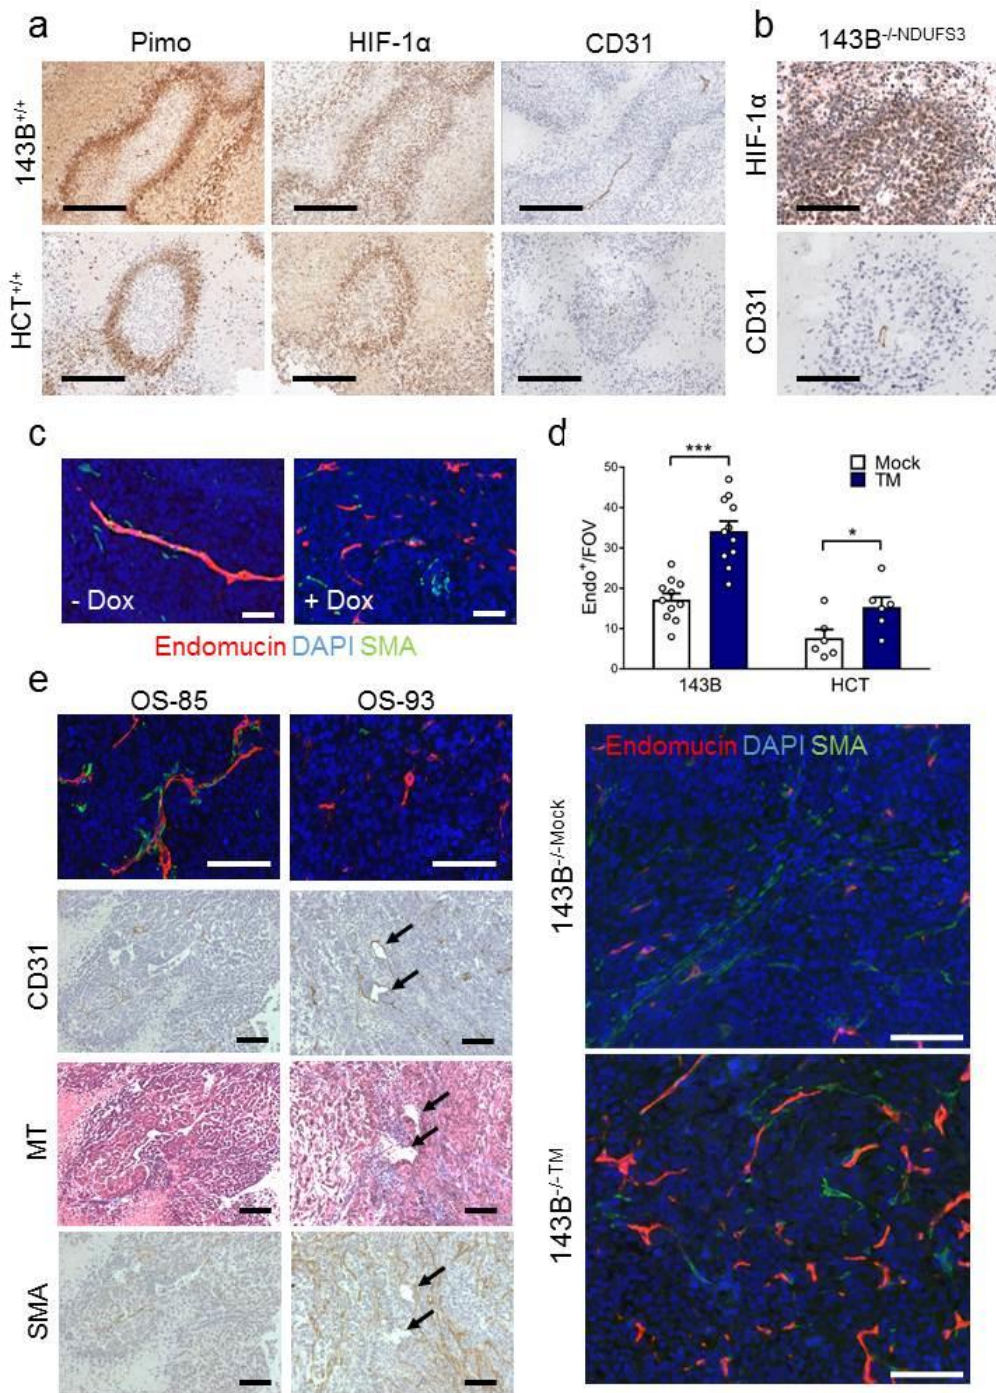

**Supplementary Figure 10. Analysis of tumor angiogenesis in CI-competent and deficient tumors.** (a) Representative images of immunohistochemical staining for hypoxia marker pimonidazole (Pimo), HIF-1 $\alpha$ , and the endothelial marker CD31 in CI-competent xenografts. Scale bars: 100  $\mu$ m. (b) Representative images of immunohistochemical analysis for HIF-1 $\alpha$  and CD31 in 143B<sup>-/-</sup>NDUFS3 xenografts. Scale bars: 100  $\mu$ m. (c) Representative images of immunofluorescent staining analyzing vessel morphology in 143B<sup>-/-</sup>NDUFS3 xenografts treated with or without Dox (1 mg mL<sup>-1</sup> in drinking water). Scale bars: 50  $\mu$ m. (d) The number of Endo<sup>+</sup> structures counted in xenografts derived from cells carrying empty vector (Mock) or TM-HIF-1 $\alpha$  (TM), in 143B (n=11, df=20, t=5.855) and HCT (n=6, df=10, t=2.375) xenografts. Representative images of the immunofluorescent staining of 143B xenografts are shown. Scale bars: 100  $\mu$ m. (e) Representative images of immunofluorescent staining analyzing vessel morphology in xenografts derived from CI-competent (OS-85) and CI-deficient (OS-93) cells carrying the m.3571insC/MT-ND1 mutation. Scale bars: 100  $\mu$ m. Masson's trichrome (MT) and CD31 immunohistochemistry of OS-85 and OS-93 xenografts. Representative images are shown. The arrows indicate lumen-bearing vessels in CI-deficient tumors. Statistical significance is specified with asterisks (\*p < 0.05, \*\*\*p < 0.001).

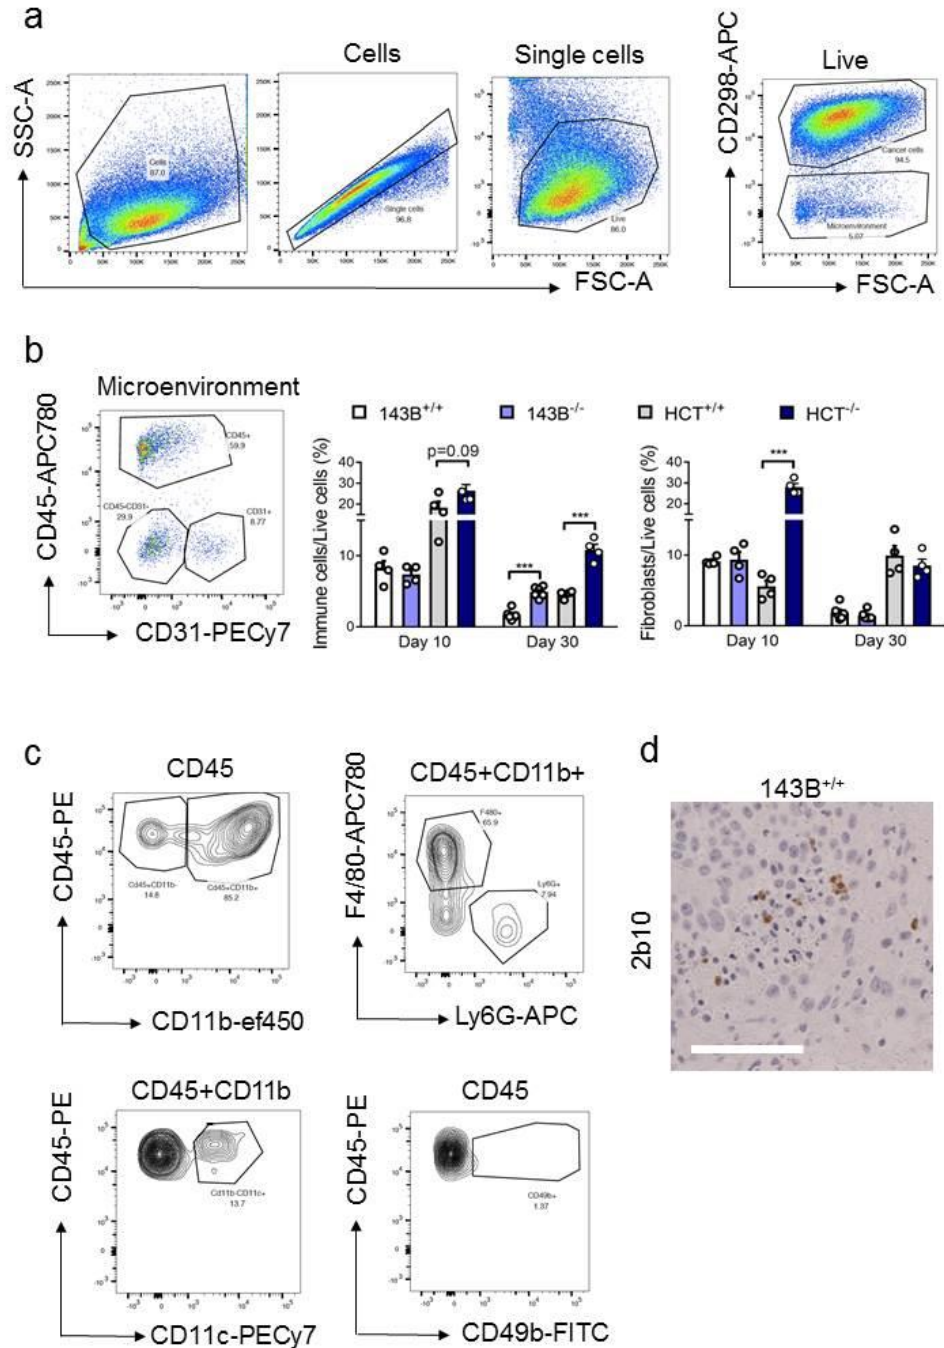

**Supplementary Figure 11. Analysis of the tumor microenvironment populations in CI-deficient and control xenografts.** (a) Gating strategy for characterization of tumor microenvironment (negative for human-specific marker CD298). The gates indicate population percentages. (b) Gating strategy and flow cytometry analysis of immune cells (CD45<sup>+</sup>CD31<sup>-</sup>) and fibroblasts (CD45<sup>-</sup>CD31<sup>-</sup>) in 143B and HCT tumors at day 10 and day 30 post-injection in ICRF nude mice. The gates indicate population percentages. Statistics data for immune cell analysis: 143B at 10 days: n=4, df=6, t=0.7; HCT at 10 days (data were log transformed) n=4, df=6, t=2; 143B at 30 days: n=6, df=10, t=7.6; HCT at 30 days: n=4, df=6, t=7.6. Statistics data for fibroblast analysis: 143B at 10 days: n=4, df=6, t=0.2; HCT at 10 days: n=4, df=6, t=11.55; 143B at 30 days: n=6, df=10, t=0.9; HCT at 30 days: n=4, df=6, t=0.8. Data are mean+s.e.m. Statistical significance is specified with asterisks (\*\*\*)p < 0.001). (c) Gating strategy for the analysis of the populations of the innate immune system: macrophages (CD11b<sup>+</sup>F4/80<sup>+</sup>Ly6G<sup>-</sup>), neutrophils (CD11b<sup>+</sup>F4/80<sup>-</sup>Ly6G<sup>+</sup>), dendritic cells (CD11b<sup>-</sup>CD11c<sup>+</sup>) and natural killer cells (CD45<sup>+</sup>CD49b<sup>+</sup>). The gates indicate population percentages. (d) Immunohistochemistry for neutrophil marker 2b10 in 143B<sup>+/+</sup> xenografts. Scale bar: 100  $\mu$ m.

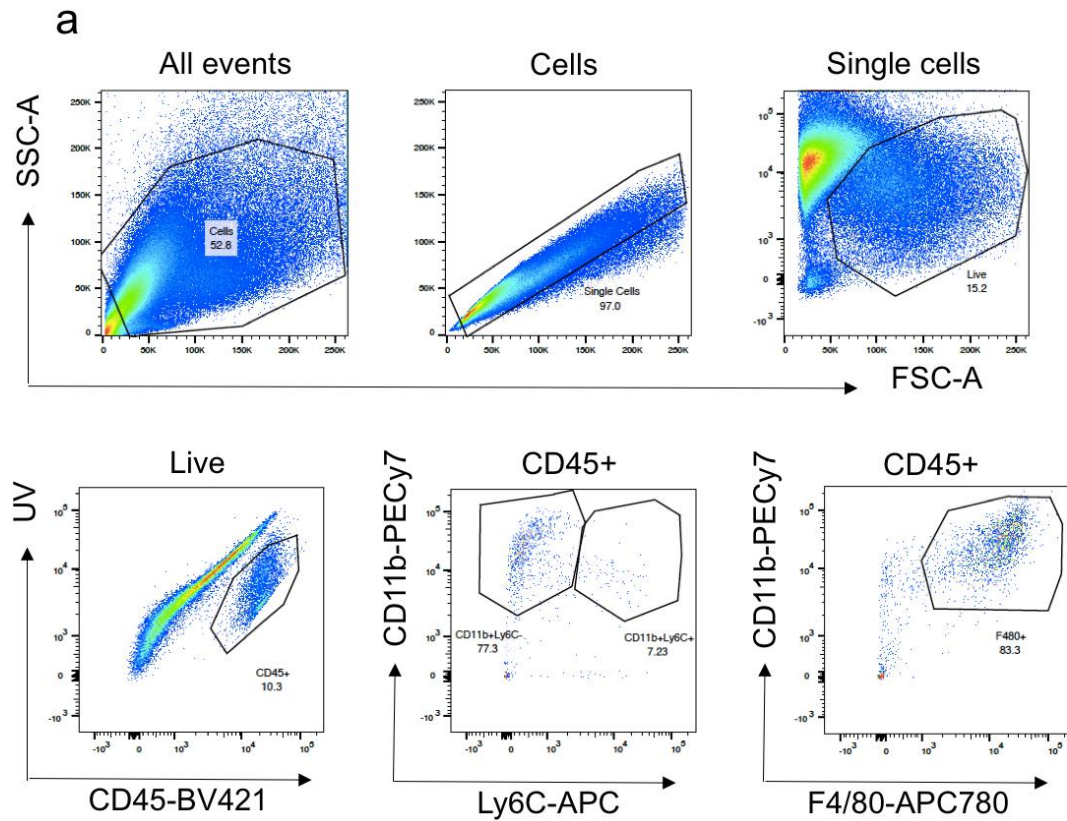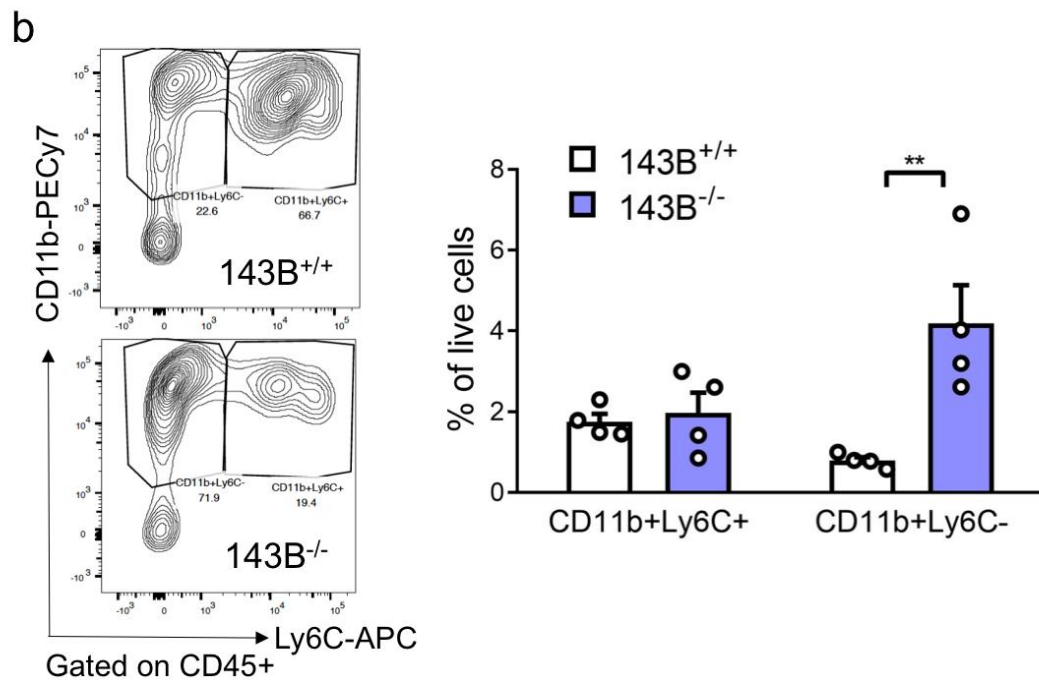

**Supplementary Figure 12. Analysis of CD11b and Ly6C markers in CI-competent and deficient tumors. (a)** Gating strategy for discrimination of undifferentiated (CD11b+Ly6C+) and differentiated (CD11b+Ly6C-) monocytes and macrophages (F4/80). The gates indicate population percentages. **(b)** Flow cytometry analysis of undifferentiated (CD11b+Ly6C+) and differentiated (CD11b+Ly6C-) monocytes in 143B<sup>+/+</sup> and 143B<sup>-/-</sup> tumors. The gates indicate population percentages. Statistical significance is specified with asterisks (\*\*p < 0.01).

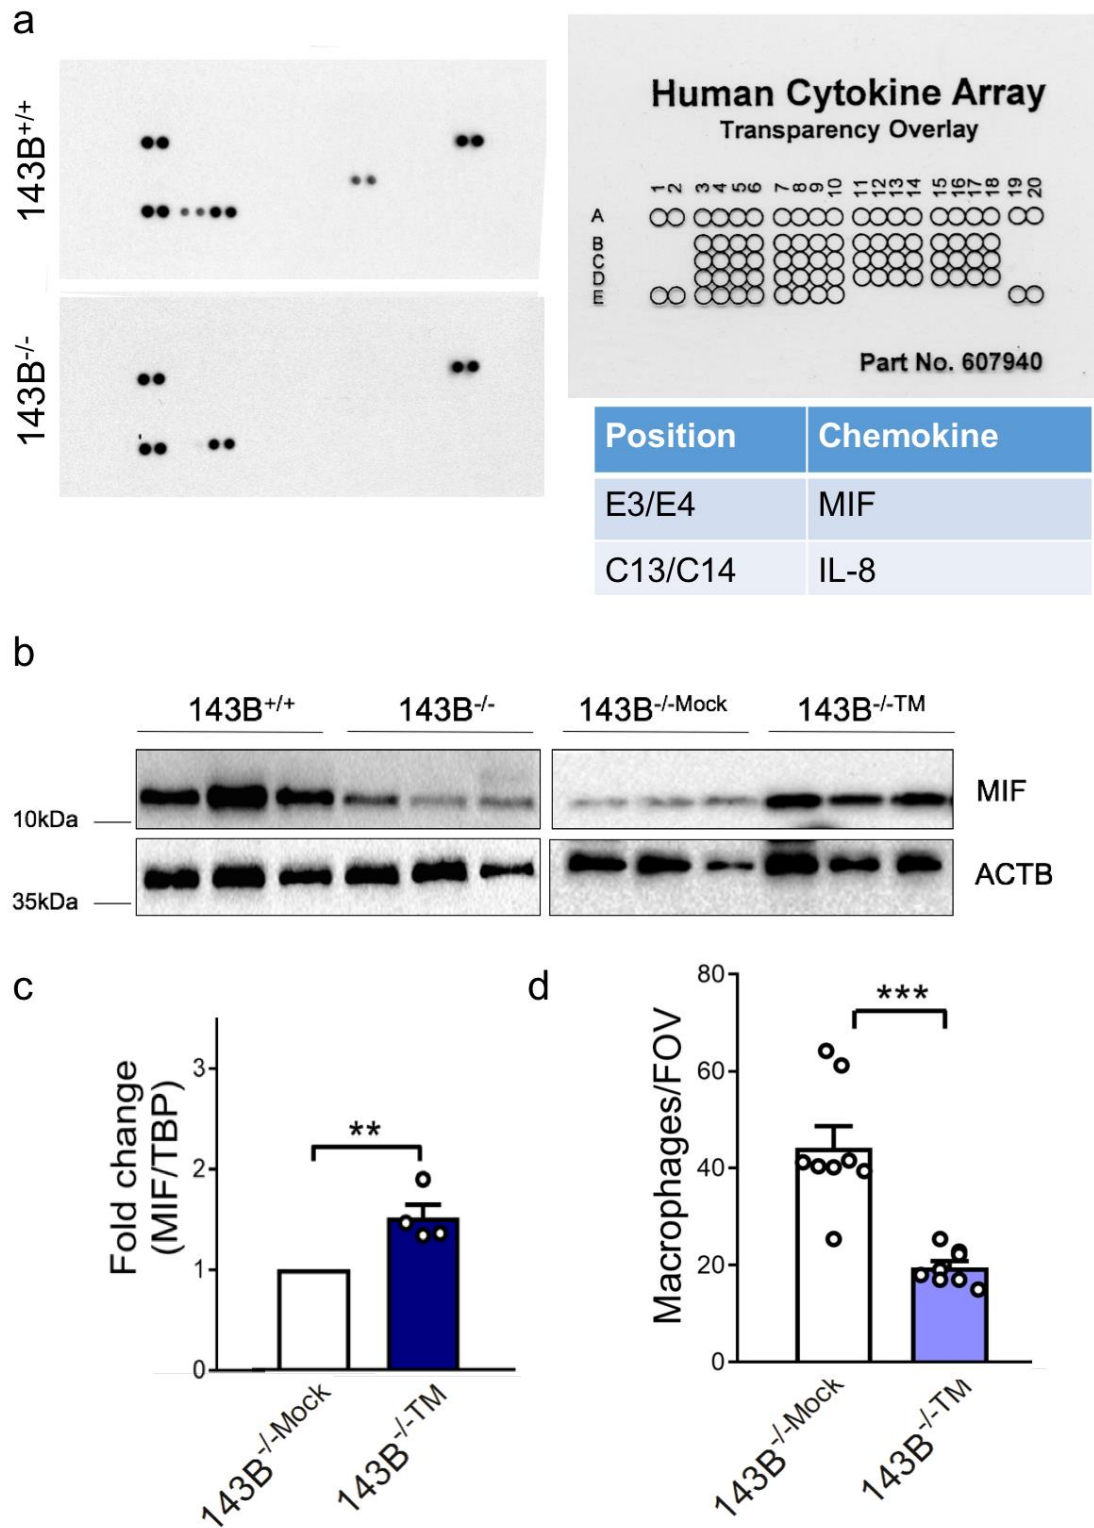

**Supplementary Figure 13. Macrophage migration inhibitory factor (MIF) is downregulated in CI-deficient tumors.** (a) Blotting of supernatants from 143B xenograft-derived cancer cells against the human cytokine array. Differentially detected cytokines are listed in the table. (b) MIF western blot analysis in xenografts derived from 143B<sup>+/+</sup>, 143B<sup>-/-</sup>, and 143B<sup>-/-</sup> cells complemented with empty vector (Mock) or TM-HIF-1 $\alpha$  (TM). ACTB was used as loading control. (c) MIF expression evaluated by qRT-PCR in xenografts deriving from 143B<sup>-/-</sup> cells complemented with empty vector (Mock) or TM-HIF-1 $\alpha$  (TM) (n=4, df=6, t=14.6). Data are mean+s.e.m. (d) The number of macrophages (F4/80<sup>+</sup>) infiltrating tumor tissue counted per Field Of View (FOV) in xenografts (n=16, df=14, t=5.325). Data are mean+s.e.m. Statistical significance is specified with asterisks (\*\*p < 0.01, \*\*\*p < 0.001).

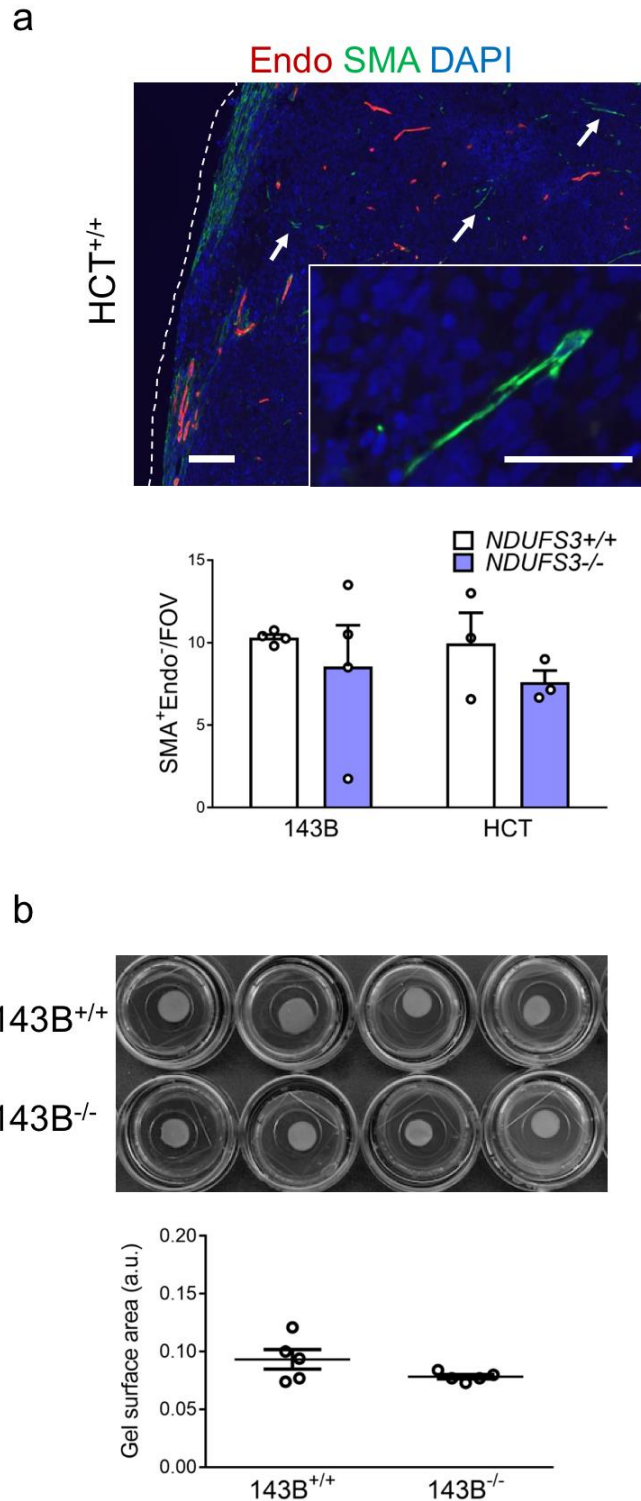

**Supplementary Figure 14. Cancer associated fibroblasts in CI-deficient and control xenografts.** (a) The number of single CAFs (SMA<sup>+</sup>Endo<sup>-</sup>) infiltrating tumor tissue counted per Field Of View (FOV) in 143B (n=4, df=3, t=0.7) and HCT (n=3, df=4, t=1.2) xenografts at day 30 post-injection. For SMA<sup>+</sup>Endo<sup>-</sup> count in 143B xenografts, the Student's t-test assuming unequal variance was applied. Data are mean±s.e.m. A representative image of immunofluorescent staining is shown. The arrows indicate the single CAFs infiltrating tumor tissue counted in 143B and HCT xenografts. Dashed lines delineate the tumor margin. Scale bars: 50  $\mu$ m. (b) *In vitro* fibroblast activation assay with conditioned media derived from 143B cells. A representative image of gel contraction at day 4 is shown. Scatter plot data are mean±s.e.m.

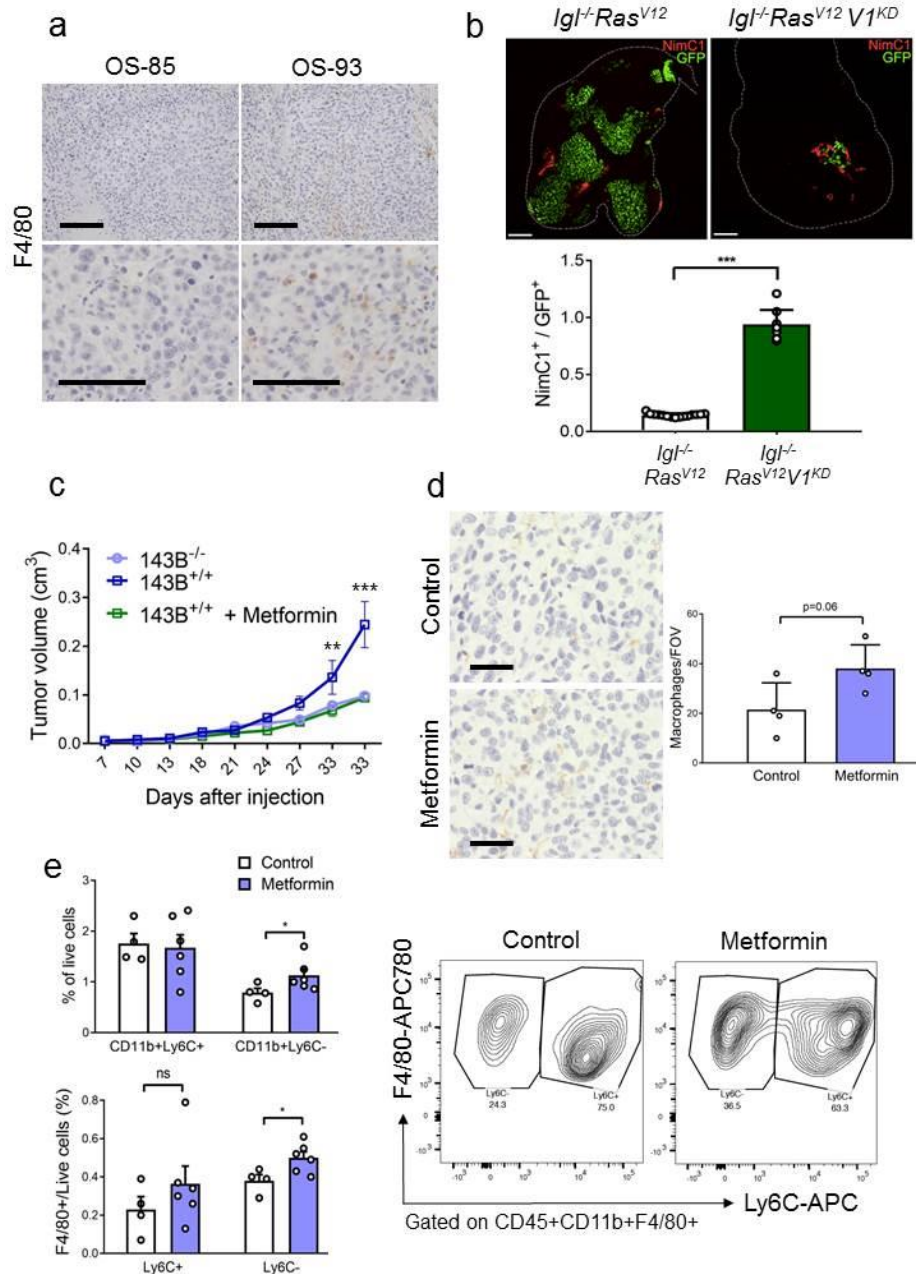

**Supplementary Figure 15. Abundance of macrophages infiltrating the tumor tissue is a general property of CI-deficient tumors.** (a) Representative images of immunohistochemical staining for macrophage marker F4/80 in CI-competent (OS-85) and CI-deficient (OS-93) xenografts carrying the m.3571insC/*MT-ND1* mutation. Scale bars: 100  $\mu$ m. (b) Representative image of staining of *Drosophila* macrophages (NimC1<sup>+</sup>) in control (*Ras*<sup>V12</sup>) and CI-deficient (*Ras*<sup>V12</sup>*V1*<sup>KD</sup>) clones (n $\geq$ 9, df=22, t=39.1). Dashed lines delineate the wing disc. Scale bars: 40  $\mu$ m. NimC1<sup>+</sup>/GFP<sup>+</sup> area per wing disc for control (*Ras*<sup>V12</sup>) and CI-deficient (*Ras*<sup>V12</sup>*V1*<sup>KD</sup>) clones is shown. Data are mean+s.e.m. (c) Tumor growth curves [n=4-6, df=8, t(143B<sup>+/+</sup> versus Metformin, day33)=3.938] of 143B<sup>-/-</sup> xenografts in ICRF nude mice, treated with metformin (2 mg mL<sup>-1</sup> in drinking water). Data are mean $\pm$ s.e.m. (d) The number of macrophages (F4/80<sup>+</sup>) infiltrating tumor tissue counted per Field Of View (FOV) in control and metformin-treated xenografts (n=4, df=6, t=2.290). A representative image of immunohistochemistry analysis for macrophage marker F4/80<sup>+</sup> in xenografts is shown. Scale bars: 50  $\mu$ m. Data are mean+s.e.m. (e) Flow cytometry analysis of undifferentiated (CD11b+Ly6C<sup>+</sup>) and differentiated (CD11b+Ly6C<sup>-</sup>) monocytes and macrophages (F4/80) in control (n=4) and metformin-treated (n=6) 143B<sup>-/-</sup> xenografts. The gates indicate population percentages. Upper panel df=8, t=2.190. Lower panel df=8, t=2.910 Data are mean+s.e.m. Statistical significance is specified with asterisks (\*p < 0.05, \*\*p < 0.01, \*\*\*p < 0.001).



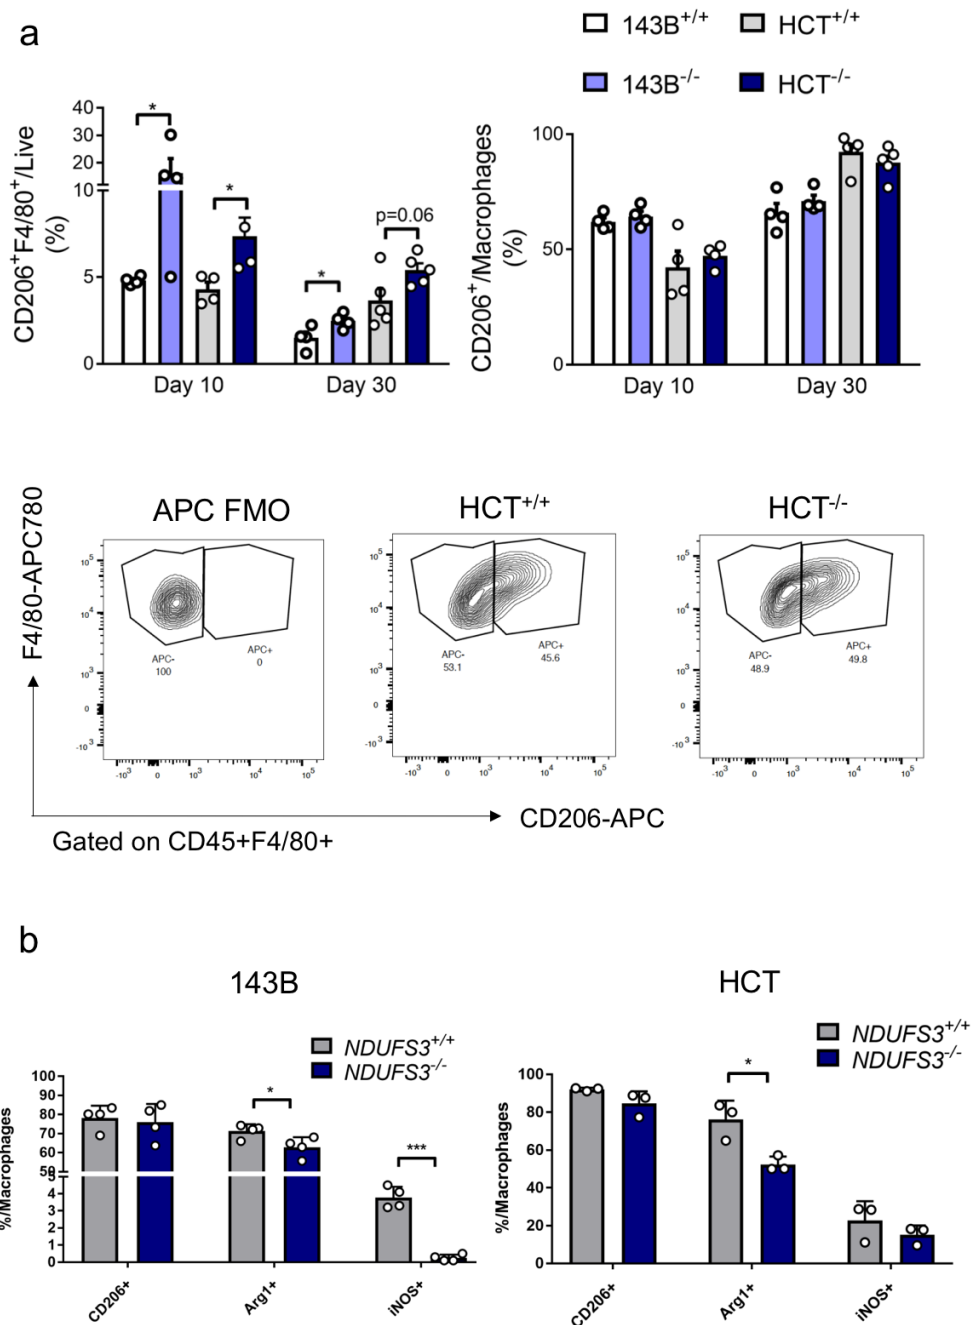

**Supplementary Figure 16. CI-deficient tumors do not display increased potential to promote M1 to M2 macrophage polarization.** (a) Flow cytometry analysis of CD206<sup>+</sup> macrophages in 143B and HCT tumors at day 10 and 30 post-injection in ICRF nude mice. The gates indicate population percentages. Statistics data for CD206/Macrophages: 143B at 10 days: n=4, df=6, t=0.8; HCT at 10 days: n=4, df=6, t=0.7; 143B at 30 days: n=4, df=6, t=1.1; HCT at 30 days: n=5, df=8, t=1. Statistics data for CD206/Live: 143B at 10 days: n=4, df=6, t=2.8; HCT at 10 days: n=4, df=6, t=2.7; 143B at 30 days: n=4, df=6, t=2.6; HCT at 30 days: n=5, df=8, t=2.4. For 143B at 10 days, the Student's t-test assuming unequal variance was applied. Data are mean+s.e.m. Representative contour plots are shown. FMO-Fluorescence Minus One. (b) Flow cytometry analysis of CD206<sup>+</sup>, Arg1<sup>+</sup> and iNOS<sup>+</sup> macrophages in 143B and HCT tumors at day 30 post-injection in ICRF nude mice. Statistics 143B: n=4, df=6, t(Arg1)=2.64, t(iNOS)=10.72. Statistics HCT: n=3, df=4, t(Arg1)=3.849. Data are mean+s.e.m. Statistical significance is specified with asterisks (\*p < 0.05, \*\*\*p < 0.001)

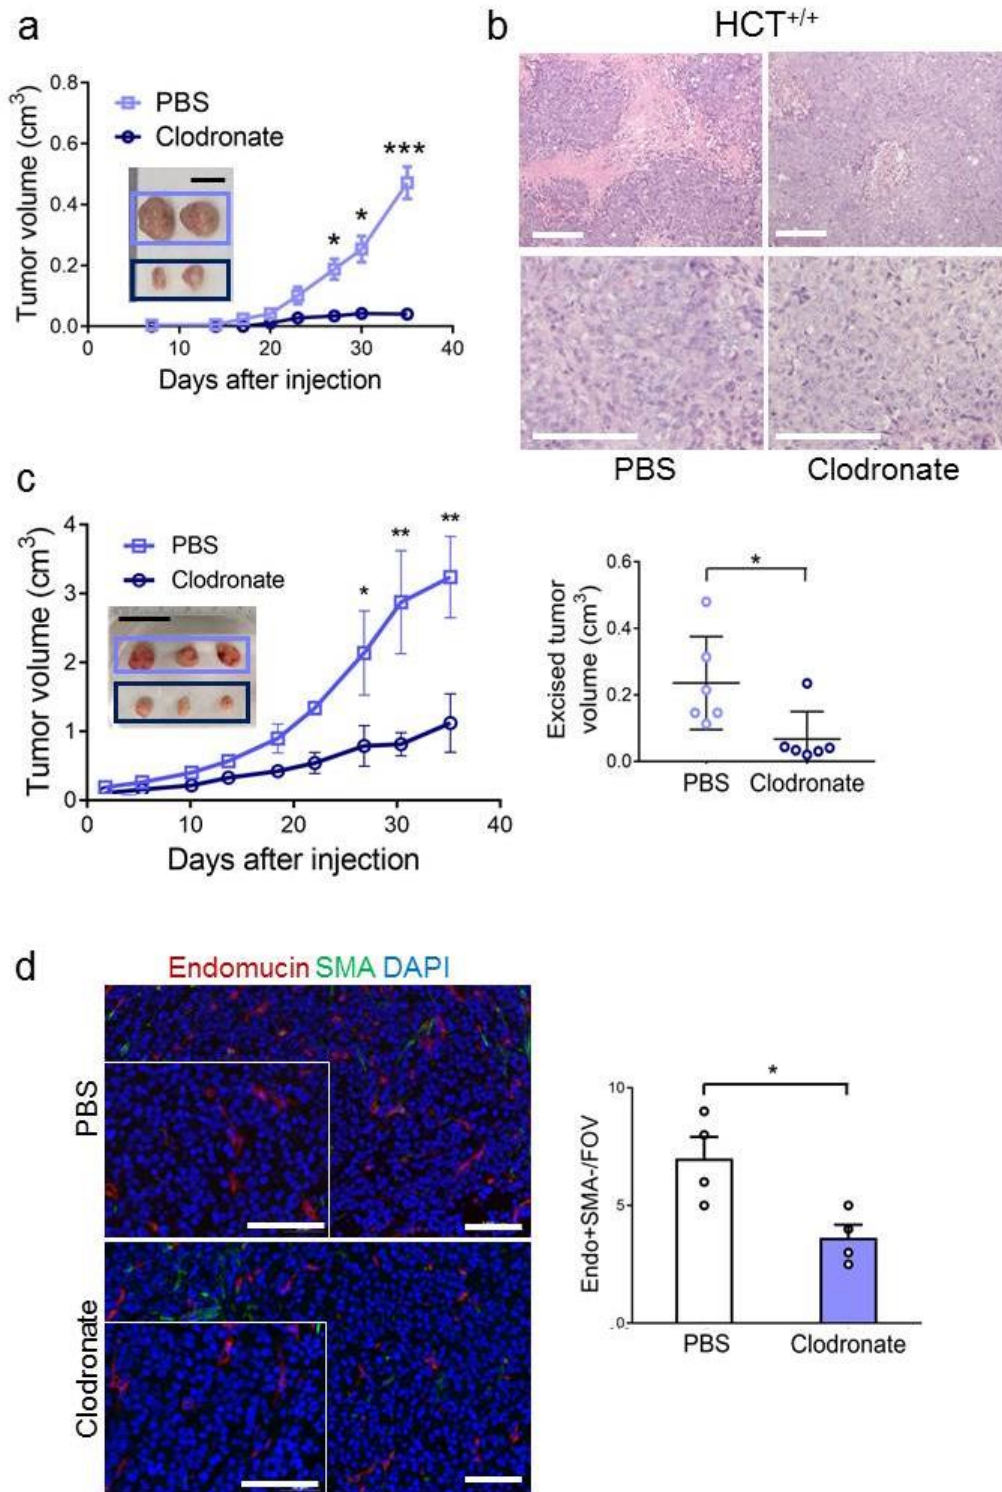

**Supplementary Figure 17. The evaluation of clodronate treatment on tumor progression of CI-competent and deficient tumors. (a)** Tumor growth curves [n=6, df=10, t(day 35)=5.59] of HCT<sup>+/+</sup> xenografts in ICRF nude mice treated with or without clodronate. Representative tumors are shown. Scale bar: 1 cm. **(b)** Haematoxylin/Eosin (HE) staining of HCT<sup>+/+</sup> xenografts in ICRF nude mice treated with or without clodronate. Scale bars: 50  $\mu$ m. Data are mean $\pm$ s.e.m. **(c)** Tumor growth curves [data were log transformed, n=6, df=10, t(day33)=3.3] and excised tumor volume (n=6, df=10, t=2.5) of 143B<sup>-/-</sup> xenografts in *Rag1<sup>-/-</sup>FVB* mice treated with or without clodronate. Data are mean $\pm$ s.e.m. Representative tumors are shown. Scale bar: 2 cm. **(d)** Representative images of immunofluorescent staining analyzing vessel morphology in 143B<sup>-/-</sup> xenografts treated with or without clodronate (n=4, df=6, t=3.16). Scale bars: 100  $\mu$ m. Data are mean+s.e.m. Statistical significance is specified with asterisks (\*p<0.05, \*\*p < 0.01, \*\*\*p<0.001).

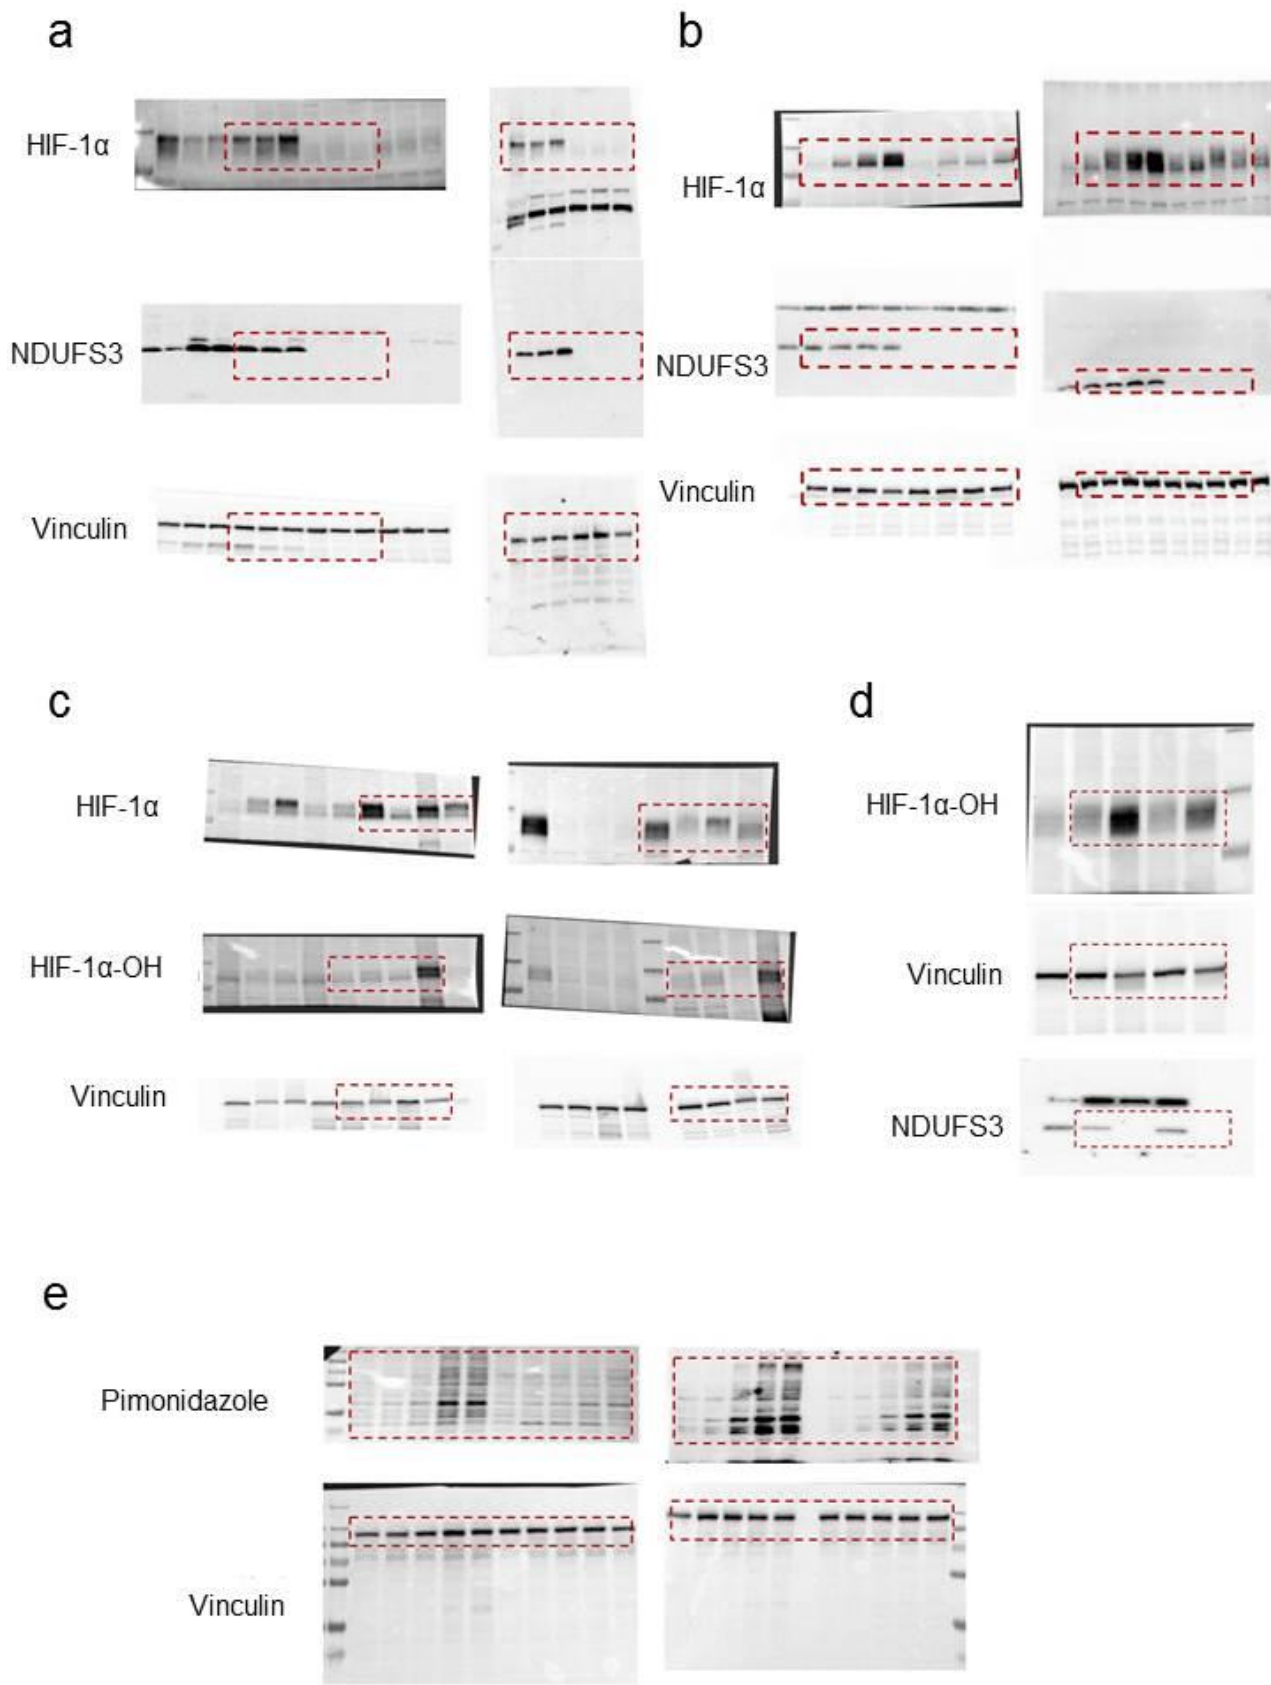

**Supplementary Figure 18. The uncropped blots for the data presented in main figures. (a)** Blots relative to Fig. 3a. **(b)** Blots relative to Fig. 3e. **(c)** Blots relative to Fig. 4b. **(d)** Blots relative to Fig. 4c. **(e)** Blots relative to Fig. 4e.

**Supplementary Table 1.** Names and sequences of primers used for qRT-PCR. Bp-base pairs

| Name       | ENTREZ Gene ID | Sequence              | Product length (bp) | Conc. in PCR ( $\mu$ M) | Amplification Efficiency |
|------------|----------------|-----------------------|---------------------|-------------------------|--------------------------|
| SLC2A1_F   | 6513           | ACTCCATCATGGGCAACAAG  | 222                 | 0.2                     | 98%                      |
| SLC2A1_R   |                | TCTGCCGACTCTCTTCCTTC  |                     | 0.4                     |                          |
| LDHA_F     | 3939           | TGGGAGTTCACCCATTAAGC  | 182                 | 0.4                     | 96%                      |
| LDHA_R     |                | AGCACTCTCAACCACCTGCT  |                     | 0.4                     |                          |
| VEGFA_F    | 7422           | ACGAGGGCCTGGAGTGTGT   | 58                  | 0.2                     | 99.7%                    |
| VEGFA_R    |                | CGCATAATCTGCATGGTGATG |                     | 0.4                     |                          |
| MIF_F      | 4282           | AGAACCGCTCCTACAGCAAG  | 121                 | 0.4                     | 97%                      |
| MIF_R      |                | GAGTTGTTCCAGCCCACATT  |                     | 0.4                     |                          |
| PPARGC1A_F | 10891          | GAGAGTCTGAGAGGGCCAAG  | 150                 | 0.4                     | 96%                      |
| PPARGC1A_R |                | TGCACTCCTCAATTCACCA   |                     | 0.4                     |                          |
| TBP_F      | 6908           | TGCACAGGAGCCAAGAGTGAA | 132                 | 0.4                     | 105%                     |
| TBP_R      |                | CACATCACAGCTCCCCACCA  |                     | 0.6                     |                          |
